# Supplementary material for: What Drives Patient Choice: Preferences for Approaches to Surgical Treatments for Breast Cancer Beyond Traditional Clinical Benchmarks
Source: PubMed Central journal article supplement — Plast Reconstr Surg Glob Open. 2018 Apr 20;6(4):e1746. doi: 10.1097/GOX.0000000000001746 (PMC5977949; doi:10.1097/gox.0000000000001746), 2018-04-20
Supplement: gox-6-e1746-s001.pdf [file gox-6-e1746-s001.pdf]

## SDC1: The ACBC Experiment

Due to the adaptive nature of the ACBC task, the survey taken by each participant varied considerably based on their stated preferences. This supplement describes the three basic steps of the task and provides sample screenshots of each step.

**Step 1 – Selection of “ideal” option to help narrow down sample space. This task is restricted to factors where there may not be a clear “ideal” choice.**

Please imagine that you were recently diagnosed with early stage breast cancer. In addition to receiving chemotherapy, your physician has told you that you have several options for the surgical treatment of your breast cancer.

Please select the responses to each feature below that best describes your "ideal situation" when undergoing a surgical treatment for breast cancer.

| Treatment Characteristic | Select your "ideal" option |
|--------------------------|----------------------------|
| Breast Look              | Select Level               |
| Doctor's Recommendation  | Select Level               |
| Follow up Imaging        | Select Level               |

**Step 2 – Screening Tasks (15 total) to help narrow down to identify participant “must have” or “deal breaker” attributes**

**Judge every option individually, not necessary to compare**

|                                                    | Option A                                                                       | Option B                                                                       | Option C                                                                       |
|----------------------------------------------------|--------------------------------------------------------------------------------|--------------------------------------------------------------------------------|--------------------------------------------------------------------------------|
| <b>20-year Overall Survival</b>                    | 45%                                                                            | 38%                                                                            | 52%                                                                            |
| <b>10-year Recurrence Rate</b>                     | 8%                                                                             | 4%                                                                             | 20%                                                                            |
| <b>Breast Look</b>                                 | <b>Somewhat similar</b> to before surgery                                      | <b>Very similar</b> to before surgery                                          | <b>Somewhat similar</b> to before surgery                                      |
| <b>Radiation Treatment</b>                         | Radiation <b>needed</b> in addition to surgery                                 | <b>No radiation</b> needed (just surgery)                                      | Radiation <b>needed</b> in addition to surgery                                 |
| <b>Doctor's Recommendation</b>                     | <b>Doctor has no opinion</b> about this treatment option                       | <b>Doctor does not recommend</b> this treatment option                         | <b>Doctor recommends</b> this treatment option                                 |
| <b>No. of surgeries, Surgery and Recovery Time</b> | 2 surgeries, surgery and recovery time of <b>6</b> months                      | 3 surgeries, surgery and recovery time of <b>9</b> months                      | <b>1</b> surgery, surgery and recovery time of <b>3</b> months                 |
| <b>Out of Pocket Costs</b>                         | \$17,296                                                                       | \$10,066                                                                       | \$6,850                                                                        |
| <b>Nipple Characteristics</b>                      | <b>Retain</b> nipples and <b>lose</b> feeling                                  | <b>Lose</b> nipples and <b>lose</b> feeling                                    | <b>Retain</b> nipples and <b>lose</b> feeling                                  |
| <b>Follow up Imaging</b>                           | <b>Yearly</b> mammograms required                                              | <b>Yearly</b> mammograms required                                              | <b>No</b> yearly mammogram requirements                                        |
|                                                    | <input type="radio"/> A possibility<br><input type="radio"/> Not a possibility | <input type="radio"/> A possibility<br><input type="radio"/> Not a possibility | <input type="radio"/> A possibility<br><input type="radio"/> Not a possibility |

**Must pick an answer for this option**
**Must pick an answer for this option**
**Must pick an answer for this option**

Step 3 – Choice tournament task to finalize rankings

|                           | Option A                                    | Compare<br>↔                                                   | Option B              | Compare<br>↔                                                     | Option C              |
|---------------------------|---------------------------------------------|----------------------------------------------------------------|-----------------------|------------------------------------------------------------------|-----------------------|
| Treatment characteristics | 20-year Overall Survival                    | 38%                                                            |                       | 38%                                                              |                       |
|                           | 10-year Recurrence Rate                     | 4%                                                             |                       | 4%                                                               |                       |
|                           | Breast Look                                 | <b>Not similar</b> to before surgery                           |                       | <b>Not similar</b> to before surgery                             |                       |
|                           | Radiation Treatment                         | Radiation <b>needed</b> in addition to surgery                 |                       | Radiation <b>needed</b> in addition to surgery                   |                       |
|                           | Doctor's Recommendation                     | <b>Doctor recommends</b> this treatment option                 |                       | <b>Doctor recommends</b> this treatment option                   |                       |
|                           | No. of surgeries, Surgery and Recovery Time | <b>1</b> surgery, surgery and recovery time of <b>3</b> months |                       | <b>2</b> surgeries, surgery and recovery time of <b>6</b> months |                       |
|                           | Out of Pocket Costs                         | \$6,850                                                        |                       | \$4,356                                                          |                       |
|                           | Nipple Characteristics                      | <b>Retain</b> nipples and <b>keep</b> feeling                  |                       | <b>Retain</b> nipples and <b>keep</b> feeling                    |                       |
|                           | Follow up Imaging                           | <b>Yearly</b> mammograms required                              |                       | <b>Yearly</b> mammograms required                                |                       |
|                           | <input type="radio"/>                       |                                                                | <input type="radio"/> |                                                                  | <input type="radio"/> |

Choose 1 of these 3 treatment options by clicking here
