# Supplementary material for: What Drives Patient Choice: Preferences for Approaches to Surgical Treatments for Breast Cancer Beyond Traditional Clinical Benchmarks
Source: PubMed Central journal article supplement — Plast Reconstr Surg Glob Open. 2018 Apr 20;6(4):e1746. doi: 10.1097/GOX.0000000000001746 (PMC5977949; doi:10.1097/gox.0000000000001746), 2018-04-20
Supplement: gox-6-e1746-s002.pdf [file gox-6-e1746-s002.pdf]

## SDC2 – Behavioral and Attitudinal Survey Questions

General instructions: Please imagine that you have to choose between **two different surgical treatment options** for breast cancer that offer **similar overall survival benefits**.

How important is maintaining your **physical attractiveness** in your choice of treatment?

Very high importance

High importance

Neither high nor low importance

Low importance

Very low importance

How important is maintaining your **femininity** in your choice of treatment?

Very high importance

High importance

Neither high nor low importance

Low importance

Very low importance

How important is it to **retain your breasts** in your choice of treatment?

Very high importance

High importance

Neither high nor low importance

Low importance

Very low importance

How important is maintaining your ability to enjoy **sexual activities** in your choice of treatment?

Very high importance

High importance

Neither high nor low importance

Low importance

Very low importance

Definition: On a scale of 1-10, pain levels of **greater than 5** can be considered as **moderate to high pain**. How important is **avoiding moderate to high pain** in your choice of treatment?

Very high importance

High importance

Neither high nor low importance

Low importance

Very low importance

How important is **avoiding serious restrictions on mobility** (like limited range of arm motion) in your choice of treatment?

Very high importance

High importance

Neither high nor low importance

Low importance

Very low importance

How important is **maintaining your employment** in your choice of treatment?

Very high importance

High importance

Neither high nor low importance

Low importance

Very low importance

Definition: Financial security is the condition of having the resources to support your standard of living now and in the foreseeable future. Using the **definition above**, how important is **keeping your financial security** in your choice of treatment?

Very high importance

High importance

Neither high nor low importance

Low importance

Very low importance

How important is **avoiding radiation therapy** in your choice of treatment?

Very high importance

High importance

Neither high nor low importance

Low importance

Very low importance

Definition: When a cancer reappears in the same part of the body as the primary cancer, it is called a **local recurrence**. Using the **definition above**, how important is **avoiding local cancer recurrence** in your choice of treatment?

Very high importance

High importance

Neither high nor low importance

Low importance

Very low importance

How important is **avoiding yearly breast imaging** in your choice of treatment?

Very high importance

High importance

Neither high nor low importance

Low importance

Very low importance

Which of the following accurately represent your **feelings** associated with breast cancer? **Check all that apply.**

Fear  
Pain/suffering  
Loss of control or independence  
Isolation  
Death

How confident do you feel in your ability to gain the **social support** (e.g., family/friends) required to undergo cancer treatment?

Very high confidence  
High confidence  
Neither high nor low confidence  
Low confidence  
Very low confidence

Please indicate your **source(s) of information** regarding breast cancer. **Check all that apply.**

Medical practitioner (physician, nurses)  
Family or Friend(s)  
Religious or social organization (e.g., church, club)  
Media (e.g., newspaper, television, magazine)  
Internet  
Support group(s)  
Other (please specify)  
None of the above

Who else might be involved in **helping** you make treatment decisions? **Check all that apply.**

My doctor(s)  
My significant other  
My family  
My friends  
Support group(s)  
No one/None

Please indicate which of these statements best describes your **decision-making style**:

I avoid making decisions because the process is too stressful  
I prefer having someone else, who I trust, make the decision for me  
I like to gather as much information before making a decision  
I use a structured process to make a decision  
None of the above
