# Supplementary material for: What Drives Patient Choice: Preferences for Approaches to Surgical Treatments for Breast Cancer Beyond Traditional Clinical Benchmarks
Source: PubMed Central journal article supplement — Plast Reconstr Surg Glob Open. 2018 Apr 20;6(4):e1746. doi: 10.1097/GOX.0000000000001746 (PMC5977949; doi:10.1097/gox.0000000000001746), 2018-04-20
Supplement: gox-6-e1746-s003.pdf [file gox-6-e1746-s003.pdf]

### SDC3: Participant flow

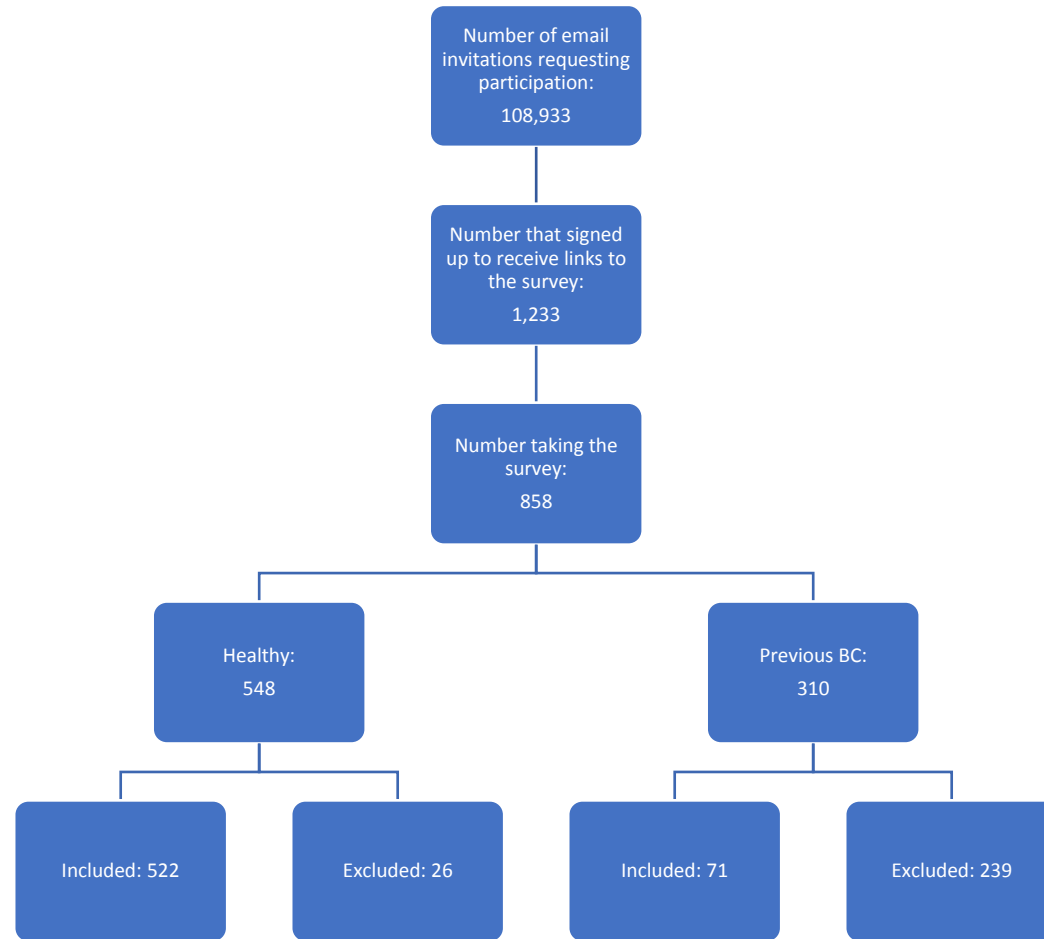

- Healthy participants were excluded if they did not complete the ACBC part of the survey because it precluded the calculation of part-worth utilities.
- Previous breast cancer patients were excluded if they reported undergoing a surgical treatment over 5 years ago due to potential recall bias and changes in the treatment paradigm OR if they did not complete the ACBC part of the survey because it precluded the calculation of part-worth utilities.
